# Supplementary material for: Environmental Influences of High-Density Agricultural Animal Operation on Human Forearm Skin Microflora
Source: Microorganisms. 2020 Sep 26;8(10):1481. doi: 10.3390/microorganisms8101481 (PMC7650789; doi:10.3390/microorganisms8101481)
Supplement: Supplementary file 1 [file microorganisms-08-01481-s001.xlsx]

## Sheet: Table S1
Table S1. Alpha diversity indices of skin microflora in different groups of forearm samples.
Group	Skin Sample		Number		Coverage		Phylogenetic Diversity							Richness						Evenness
			nseqs		coverage		bergerparker	invsimpson	npshannon	qstat	shannon	simpson		ace	bootstrap	chao	jackknife	sobs		simpsoneven	heip	shannoneven	smithwilson
A	1		37636		0.980338		0.339011	5.26621	2.52792	585.734	2.4269	0.18989		14349.7	1202.16	4664.62	6108.05	919		0.00573	0.011246	0.355678	0.330667
	2		14475		0.965803		0.156753	34.8272	5.68296	441.439	5.58111	0.028713		1955.7	1675.35	2021.04	2433.2	1455		0.023936	0.18182	0.766346	0.328514
	3		57967		0.98111		0.074732	49.1761	5.50678	861.037	5.43507	0.020335		4221.89	3424.12	4470.22	6526.08	2950		0.01667	0.077419	0.680271	0.404659
	4		43266		0.978482		0.156705	20.9691	4.94401	742.287	4.85441	0.047689		3524.31	2816.2	3675.14	5071.02	2413		0.00869	0.05278	0.623269	0.373377
	5		82512		0.979458		0.057264	63.8567	5.5828	1220.92	5.50737	0.01566		7778.45	4496	6536.6	9619.42	3781		0.016889	0.064948	0.668554	0.416428
	6		54068		0.975938		0.15732	23.411	5.35338	1084.23	5.2564	0.042715		4877.48	3849.9	4927.23	6256.72	3282		0.007133	0.05815	0.649242	0.374315
	7		13800		0.964058		0.095652	26.4772	4.72552	411.889	4.59633	0.037768		2122.21	1337.36	1783	2363.31	1123		0.023577	0.087451	0.654397	0.333406
	8		42271		0.977857		0.126115	21.0035	4.66349	615.317	4.57672	0.047611		4321.8	2454.91	3930.04	5658.17	2068		0.010156	0.046538	0.599491	0.391588
	9		21073		0.954302		0.093342	48.7228	5.7363	758.029	5.59925	0.020524		4224.35	2625.16	3456.53	4497.75	2208		0.022066	0.121986	0.72719	0.310446
B	10		52730		0.980865		0.215797	10.225	3.18764	797.089	3.09766	0.097799		15725	1675.78	6531.64	7645.2	1289		0.007933	0.016418	0.432536	0.356209
	11		190944		0.989358		0.306414	6.28944	2.38965	1603.56	2.32319	0.158997		26139	3236.09	13204.4	24446.8	2457		0.00256	0.003749	0.297589	0.061525
	12		41178		0.978484		0.281485	8.78065	3.11851	692.494	3.0205	0.113887		18019.7	1403.11	6293.4	5992.2	1066		0.008237	0.018311	0.433254	0.350092
	13		43393		0.984468		0.370152	3.9581	2.02991	541.011	1.94079	0.252646		8717.44	1080.15	3766.47	3954.01	821		0.004821	0.007273	0.289216	0.226873
	14		57460		0.980752		0.30804	6.03991	2.49086	877.159	2.38537	0.165565		14073.3	1767.52	6848.09	10262.6	1343		0.004497	0.00735	0.33118	0.139214
	15		35012		0.976065		0.249457	8.45794	3.10065	652.82	2.99329	0.118232		17857	1348.57	6187.4	6074.56	1030		0.008212	0.018417	0.431476	0.355701
	16		97837		0.961405		0.083087	95.1709	6.87982	2726.73	6.77429	0.010507		17402.6	9900.36	13831.8	19544.3	8294		0.011475	0.105397	0.750756	0.364166
	17		54817		0.971432		0.268056	12.9565	5.2316	1263.8	5.11346	0.077181		5725.4	4409.06	5799.92	7911.72	3730		0.003474	0.044313	0.62176	0.345748
C	18		52796		0.985131		0.09586	31.0086	4.41356	401.791	4.36039	0.032249		8320.17	1589.36	4361.2	4861.89	1284		0.02415	0.06024	0.609186	0.482429
	19		29948		0.977862		0.08842	30.9984	4.81544	495.323	4.73286	0.03226		2826.98	1877.25	2746.97	4021.05	1598		0.019398	0.07052	0.641612	0.389818
	20		26649		0.966828		0.372584	6.75239	4.13893	706.921	3.98646	0.148096		3869.72	2240.94	3093.19	4113.59	1862		0.003626	0.028406	0.529452	0.290015
D	21		49082		0.989996		0.31806	7.81714	3.35743	240.825	3.3105	0.127924		3240.96	1101.18	2651.41	4134.81	908		0.008609	0.029106	0.486035	0.475119
	22		60141		0.990838		0.300477	5.35585	2.4856	332.237	2.43444	0.186712		4959.74	1054.75	3004.64	3695.34	840		0.006376	0.012407	0.361546	0.43439
	23		14369		0.985524		0.152551	19.2534	3.93115	122.308	3.8779	0.051939		1073.63	545.774	950.273	1493.9	461		0.041764	0.102875	0.632259	0.474196
	24		13927		0.985711		0.313348	8.4642	3.40199	100.267	3.34562	0.118145		1165.42	489.054	1025.66	1286.64	410		0.020644	0.066939	0.556106	0.469128
	25		80814		0.988999		0.141077	16.8057	3.84636	393.189	3.79868	0.059504		6837.04	1860.24	6002.41	7385.16	1517		0.011078	0.028788	0.518627	0.461952
	26		53545		0.986946		0.267719	7.91533	3.08493	501.087	3.01475	0.126337		4024.24	1508.19	2702.49	3888.78	1224		0.006467	0.01585	0.424023	0.399955
	27		56845		0.983393		0.309051	8.45411	3.55526	570.72	3.47988	0.118286		8712.15	1801.22	4937.69	5903.21	1433		0.0059	0.021966	0.478826	0.435095
	28		69779		0.984365		0.080612	42.0425	4.68965	498	4.63537	0.023785		10234.1	2191.84	6140.02	9689.74	1768		0.02378	0.057763	0.619901	0.474907
	29		51387		0.984159		0.342966	5.78192	2.83885	654.984	2.7578	0.172953		7910.16	1521.07	4689.06	6471.4	1206		0.004794	0.012253	0.388693	0.393128
	30		23467		0.979503		0.246985	6.74848	2.94216	299.014	2.84618	0.148182		3767.25	953.797	2390.92	2988.85	765		0.008822	0.021233	0.42865	0.390503

## Sheet: Fig. S1
Figure S1. Heatmap for phylogenetic relativeness of forearm skin microbiome. The phylogenetic distance values were calculated based on thetayc coefficient and displayed as the color codes representing the similarities between sampled skin microbial communities. The scale bar, matching with the color code (dark to bright) represents the level of similarity (0.000 to 0.250) normalized by Phylip dis…
